# Supplementary material for: BMP suppresses WNT to integrate patterning of orthogonal body axes in adult planarians
Source: PubMed Central journal article supplement (PMC10545109; doi:10.1371/journal.pgen.1010608), 2023-09-20

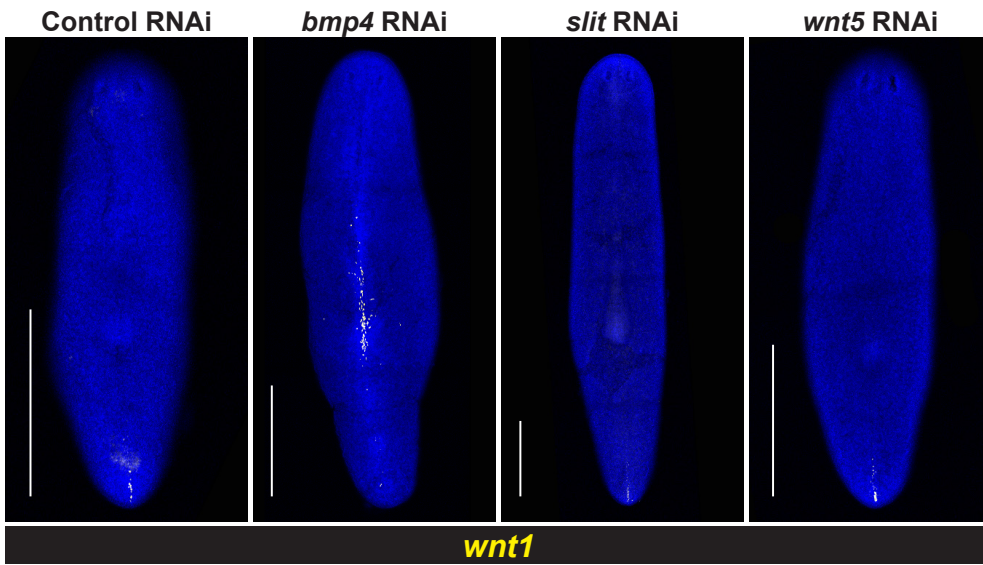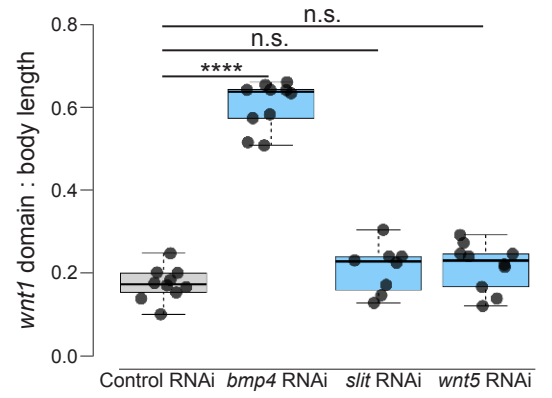

Supplement: pgen.1010608.s012.pdf [file pgen.1010608.s012.pdf]
