# Supplementary material for: BMP suppresses WNT to integrate patterning of orthogonal body axes in adult planarians
Source: PubMed Central journal article supplement (PMC10545109; doi:10.1371/journal.pgen.1010608), 2023-09-20
Supplement: pgen.1010608.s013.pdf [file pgen.1010608.s013.pdf]

**Table S1. Primer sequences**

| <b>Gene name</b>   | <b>ddv6</b>          | <b>Left Primer</b>        | <b>Right Primer</b>        | <b>Primer Use</b> |
|--------------------|----------------------|---------------------------|----------------------------|-------------------|
| <i>bmp4</i>        | dd_Smed_v6_17402_0_1 | TCCATCAGAGAAAGTTCGCAGT    | ACGAATGTACAGTTTCAGTTGCA    | riboprobe, dsRNA  |
| <i>dd23400</i>     | dd_Smed_v6_23400_0_1 | GCCCATCAGATGTCCGCTTA      | TTTTCCAACACAGTGCAACACA     | riboprobe, dsRNA  |
| <i>wnt1</i>        | dd_Smed_v6_28398_0_1 | CCTCAAAATCGAATTTTACTCA    | TGGGACAAAAATAAAATTCACA     | riboprobe, dsRNA  |
| <i>nog1</i>        | dd_Smed_v6_764_0_1   | CAAATGAAAGATTTTCGAGGTGA   | TGTTGAACAGAGCATCAATGAA     | dsRNA             |
| <i>nog2</i>        | dd_Smed_v6_1134_0_1  | CCACATCGACATGTTAGCAA      | ATCGCGACAATGTCTCACAG       | dsRNA             |
| <i>smad1</i>       | dd_Smed_v6_6877_0_1  | CATCTCCGGCTGTAAACGG       | CCACAAGAATAAAGCAAAATGGCA   | dsRNA             |
| <i>smad4</i>       | dd_Smed_v6_1923_0_1  | CTTCAAATGCCCCGGCGAAA      | TCGAGTATCGCGCTGATTCC       | dsRNA             |
| <i>tbx2/3</i>      | dd_Smed_v6_11693_0_1 | GCTTCGTTTCTGCCGAGTTT      | CGGATGGGTTTTGAATCGCG       | dsRNA             |
| <i>nlg8</i>        | dd_Smed_v6_8738_0_1  | CCTCCACGTGAATCCACAGT      | TCGTTTTCCAGAACTGAGAAA      | dsRNA             |
| <i>notum</i>       | dd_Smed_v6_24180_0_1 | AAAATTTCTGAGGATCGAAAAA    | TGAAGCTAGATTTATGTGAAAAACCA | riboprobe, dsRNA  |
| <i>sfrp-1</i>      | dd_Smed_v6_13985_0_1 | TTGAATTCATGGAAATGACCAA    | AATCAATGAAATGTTTTGTTGTGA   | riboprobe         |
| <i>ndt-5</i>       | dd_Smed_v6_5102_0_1  | ACAGTATTTCTTAACACGGGTCA   | TGAACCATACGGAGCGGT         | riboprobe         |
| <i>wntP-2</i>      | dd_Smed_v6_7326_0_1  | TTAAATGTTCTAAGCCAAAACAACA | AAAACTTTTATGATCAATCTGAATGC | riboprobe         |
| <i>fzd4-1</i>      | dd_Smed_v6_11650_0_1 | GGAATAGCCCAACTCACCAA      | TGCCGAATTTAGTTGGAAGC       | riboprobe         |
| <i>wnt11-1</i>     | dd_Smed_v6_14391_0_1 | CATGAGCCAGTAAATGAAATGGT   | TAGCACTGCGTTGGTGTTTG       | riboprobe         |
| <i>wnt11-2</i>     | dd_Smed_v6_16209_0_1 | TTGATCGCATGAAAAATTACAAA   | CCATTGCAATAAAATTTGTTCA     | riboprobe         |
| <i>netrin-2</i>    | dd_Smed_v6_14852_0_1 | CAGACCGACACATTCCAAAA      | GTTACATTTTCCGCGTTTT        | riboprobe         |
| <i>kal-1</i>       | dd_Smed_v6_6746_0_1  | CGAGTTCTGAACCTGGCTGT      | GTTTCCCCTCCTGTGTGAA        | riboprobe, dsRNA  |
| <i>slit</i>        | dd_Smed_v6_12111_0_1 | TCCGTGACAATCAGCTGCAA      | AAGCCGATGATTGCCGAGAA       | riboprobe, dsRNA  |
| <i>wnt5</i>        | dd_Smed_v6_15469_0_1 | TCGGGGTGACCTTTACTCA       | TGAACCCATTGCAGTGAAAA       | riboprobe, dsRNA  |
| <i>SMU15007112</i> | dd_Smed_v6_9120_1_1  | CCCCGTGTGGATATTTCAAGT     | AGCAAAATCGGTTCTCCGTA       | riboprobe         |
| <i>foxA</i>        | dd_Smed_v6_10718_0_1 | AACGACCTCAACGGAATGTTT     | CATGCGCCAAAGTTAAGGATA      | riboprobe         |
| <i>laminin</i>     | dd_Smed_v6_8356_0_1  | AGTCGCTGGCAAAGTGCATCT     | AATGATGCGTGGTATCCACAG      | riboprobe         |
| <i>laminB</i>      | dd_Smed_v6_3065_0_1  | AGTTCAACTCCTGGCGCTAC      | CTGAACATTCGGATCACCT        | riboprobe         |
| <i>ubiquilin</i>   | dd_Smed_v6_1364_0_1  | AAATTCGCCTGCCTGTTGGG      | CCGGTGGCATTAAATCCATCTGT    | qRT-PCR           |
| <i>bmp4</i>        | dd_Smed_v6_17402_0_1 | TGGATCATAGCCCCCAGAA       | TGCATGGTTGTGGCATTGA        | qRT-PCR           |
| <i>wnt5</i>        | dd_Smed_v6_15469_0_1 | GATCACATGCCAGCAGTCAG      | TCAGCTGCCTTTGACACTCT       | qRT-PCR           |
|                    |                      |                           |                            |                   |
|                    |                      |                           |                            |                   |
|                    |                      |                           |                            |                   |
